# Supplementary material
Source: publisher figshare collection journal article supplement (https://acs.figshare.com/ndownloader/files/7812193)

## Supporting information:

**Fig. S1** Typical HPLC chromatographs of the product solution after the conversion of xylose (a), arabinose (b) and xylan (c). (140 °C, 180 min, water-GVL (1:19), 30 mg/ml substrate, 0.1 M IL1)

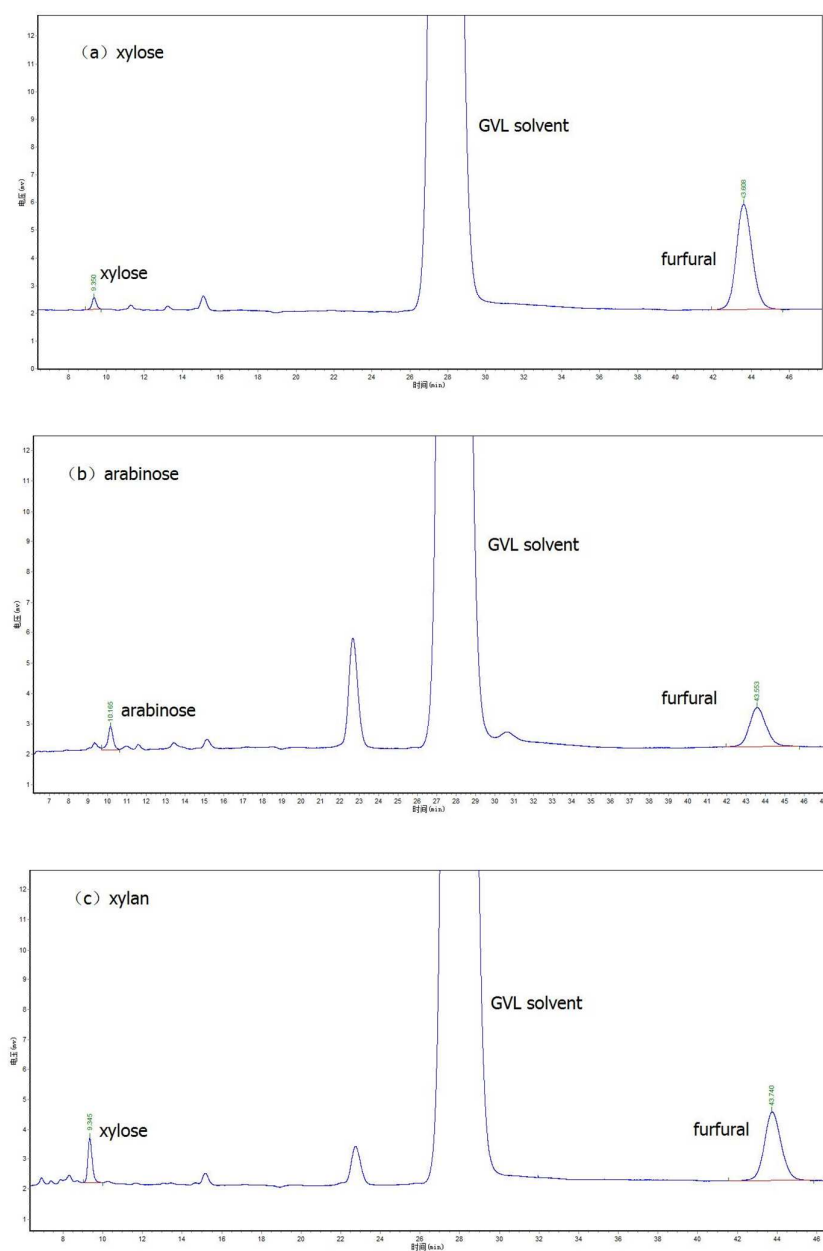

Supplement: Supplementary file 1 [file 7812193]
